# Supplementary material for: Transient expression of the neuropeptide galanin modulates peripheral‑to‑central connectivity in the somatosensory thalamus during whisker development in mice
Source: PubMed Central journal article supplement (PMC10980825; doi:10.1038/s41467-024-47054-5), 2024-03-29
Supplement: 41467_2024_47054_MOESM3_ESM.pdf [file 41467_2024_47054_MOESM3_ESM.pdf]

## Inventory of Supporting/Supplementary Information:

### **Transient expression of the neuropeptide galanin modulates peripheral-to-central connectivity in the somatosensory thalamus during whisker development in mice**

Zsofia Hevesi, Joanne Bakker, Evgenii O. Tretiakov, Csaba Adori, Anika Raabgrund, Swapnali S. Barde, Martino Caramia, Thomas Krausgruber, Sabrina Ladstätter, Christoph Bock, Tomas Hökfelt<sup>§</sup> and Tibor Harkany<sup>§</sup>

<sup>§</sup>Correspondence should be addressed to either **Tomas Hökfelt** ([Tomas.Hokfelt@ki.se](mailto:Tomas.Hokfelt@ki.se)) or **Tibor Harkany** ([Tibor.Harkany@meduniwien.ac.at](mailto:Tibor.Harkany@meduniwien.ac.at)).

#### Supporting Information:

- Source data file,
- Author Checklist,
- Editorial Policy Checklist,
- Reporting Summary,
- Author list change form,
- Featured Image suggestion.

#### The Supplementary Information file contains:

- 4 supplementary figures,
- 3 supplementary tables,
- legends to supplementary figures and tables.
